# Supplementary material for: Human herpesvirus 8 molecular mimicry of ephrin ligands facilitates cell entry and triggers EphA2 signaling
Source: PLOS journal article supplement (doi:10.1371/journal.pbio.3001392), 2021-09-09

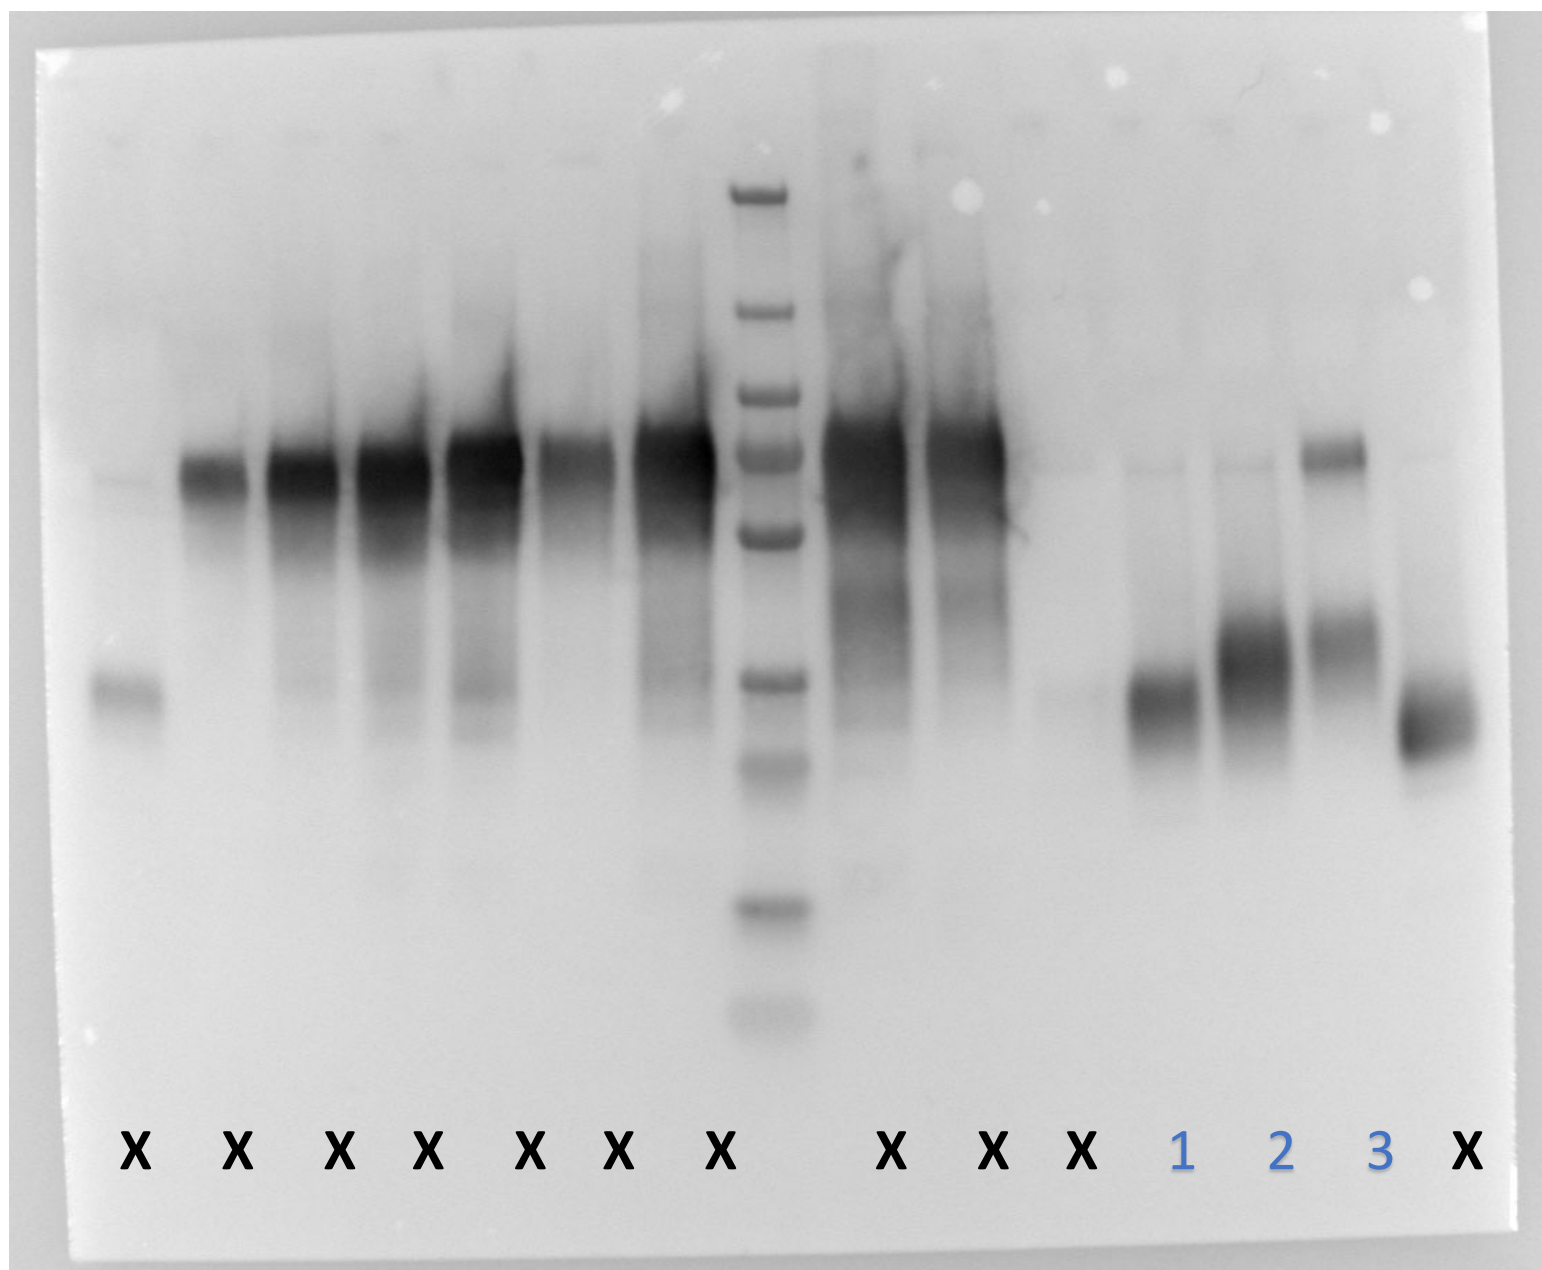

Supplement: S20 (10.1371/journal.pbio.3001392.s020) [file journal.pbio.3001392.s020]
